# Supplementary material for: A freeze-and-thaw-induced fragment of the microtubule-associated protein tau in rat brain extracts: implications for the biochemical assessment of neurotoxicity
Source: PubMed Central journal article supplement (PMC7990086; doi:10.1042/bsr20203980), 2021-03-24
Supplement: BSR-2020-3980_supp.pdf [file BSR-2020-3980_supp.pdf]

## SUPPLEMENTARY MATERIAL

**Figure S1.** Raw data of **Fig.1 – Panel A** western blotting of -20°C freeze/thawed rat hippocampus extracts (lanes used in the main figure are indicated by dotted frames).

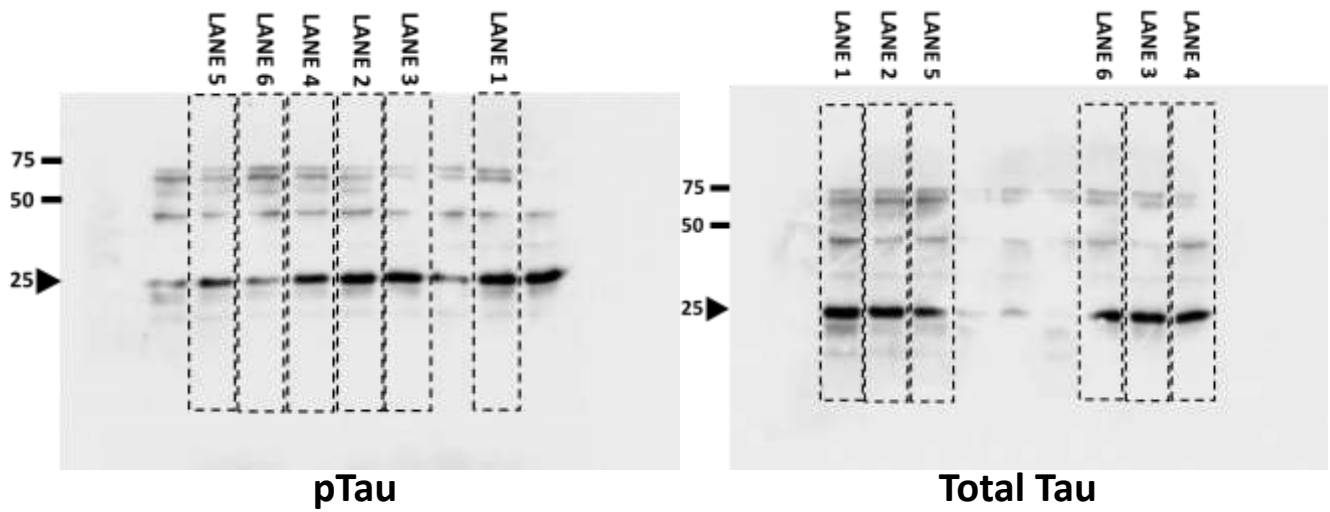

**Figure S2.** Raw data of **Fig.1 – Panel B** western blotting of  $-20^{\circ}\text{C}$  freeze/thawed frontal rat cortex extracts (lanes used in the main figure are indicated by dotted frames).

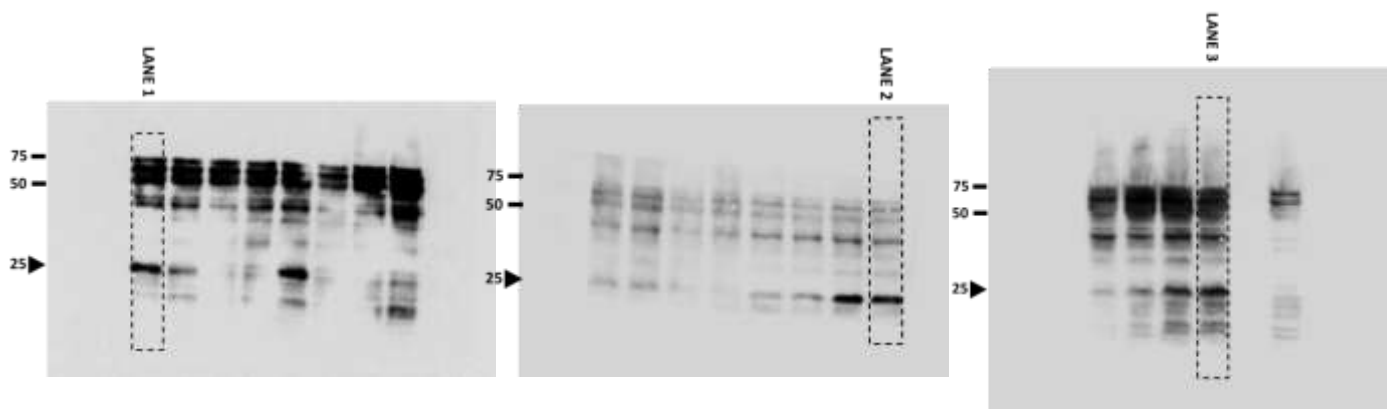

**pTau**

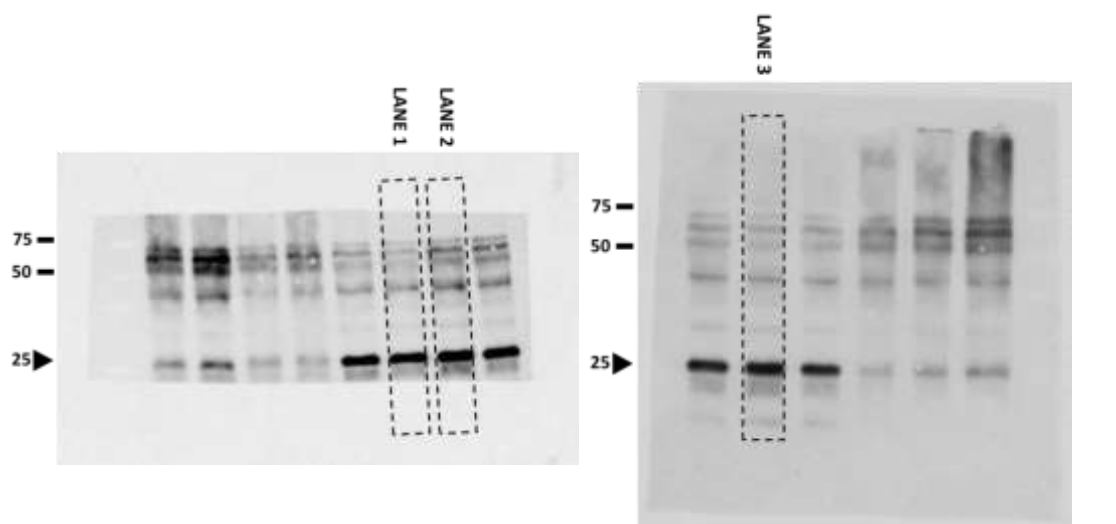

**Total Tau**

**Figure S3.** Raw data of **Fig.1 – Panel C** western blotting of fresh rat hippocampus extracts (lanes used in the main figure are indicated by dotted frames).

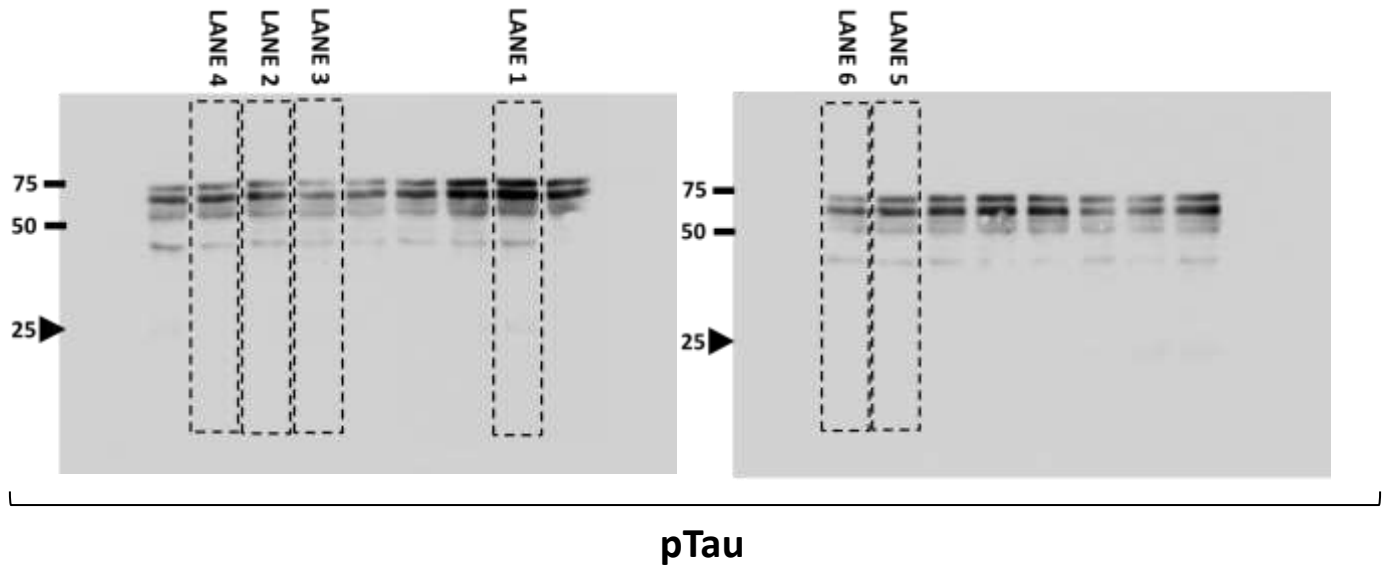

**Total Tau**

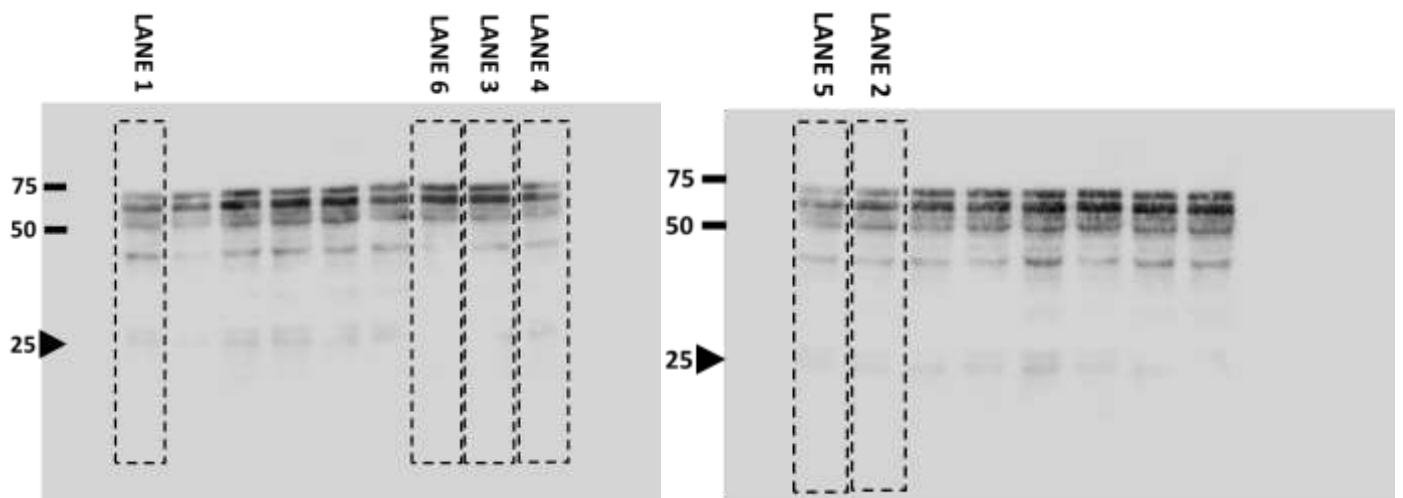

**Figure S4.** Raw data of **Fig.1 – Panel D** western blotting of fresh rat frontal cortex extracts (lanes used in the main figure are indicated by dotted frames).

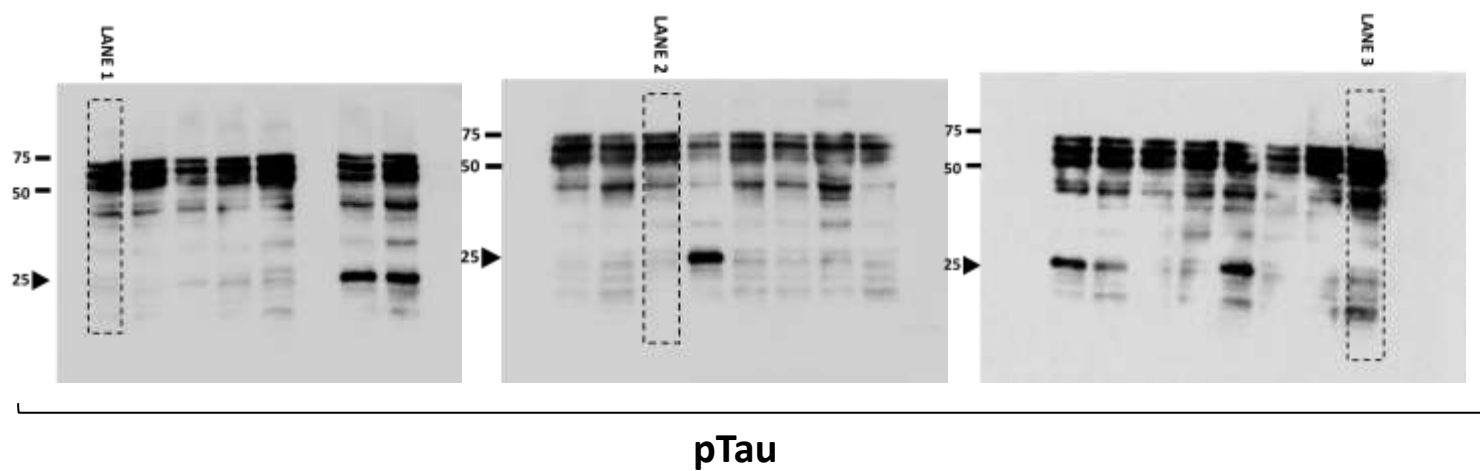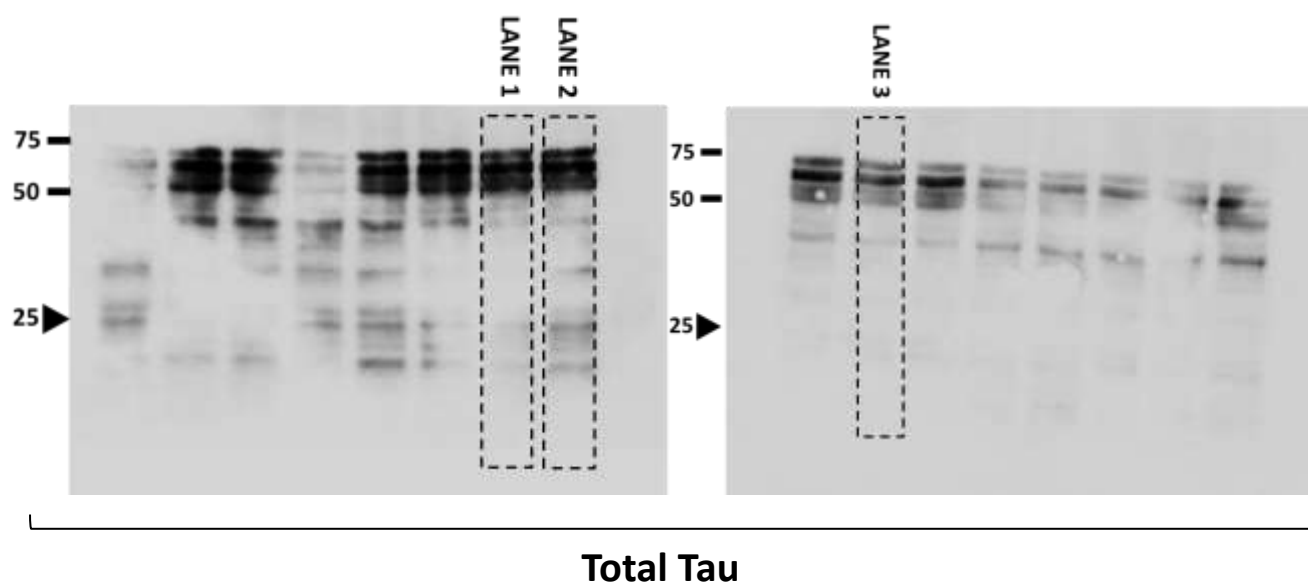

**Figure S5.** Raw data of **Fig.1 – Panel E** western blotting of freeze/thawed rat frontal cortex extracts (lanes used in the main figure are indicated by dotted frames). Asterisks (\*) stand for lanes with rat extracts from other cerebral tissue.

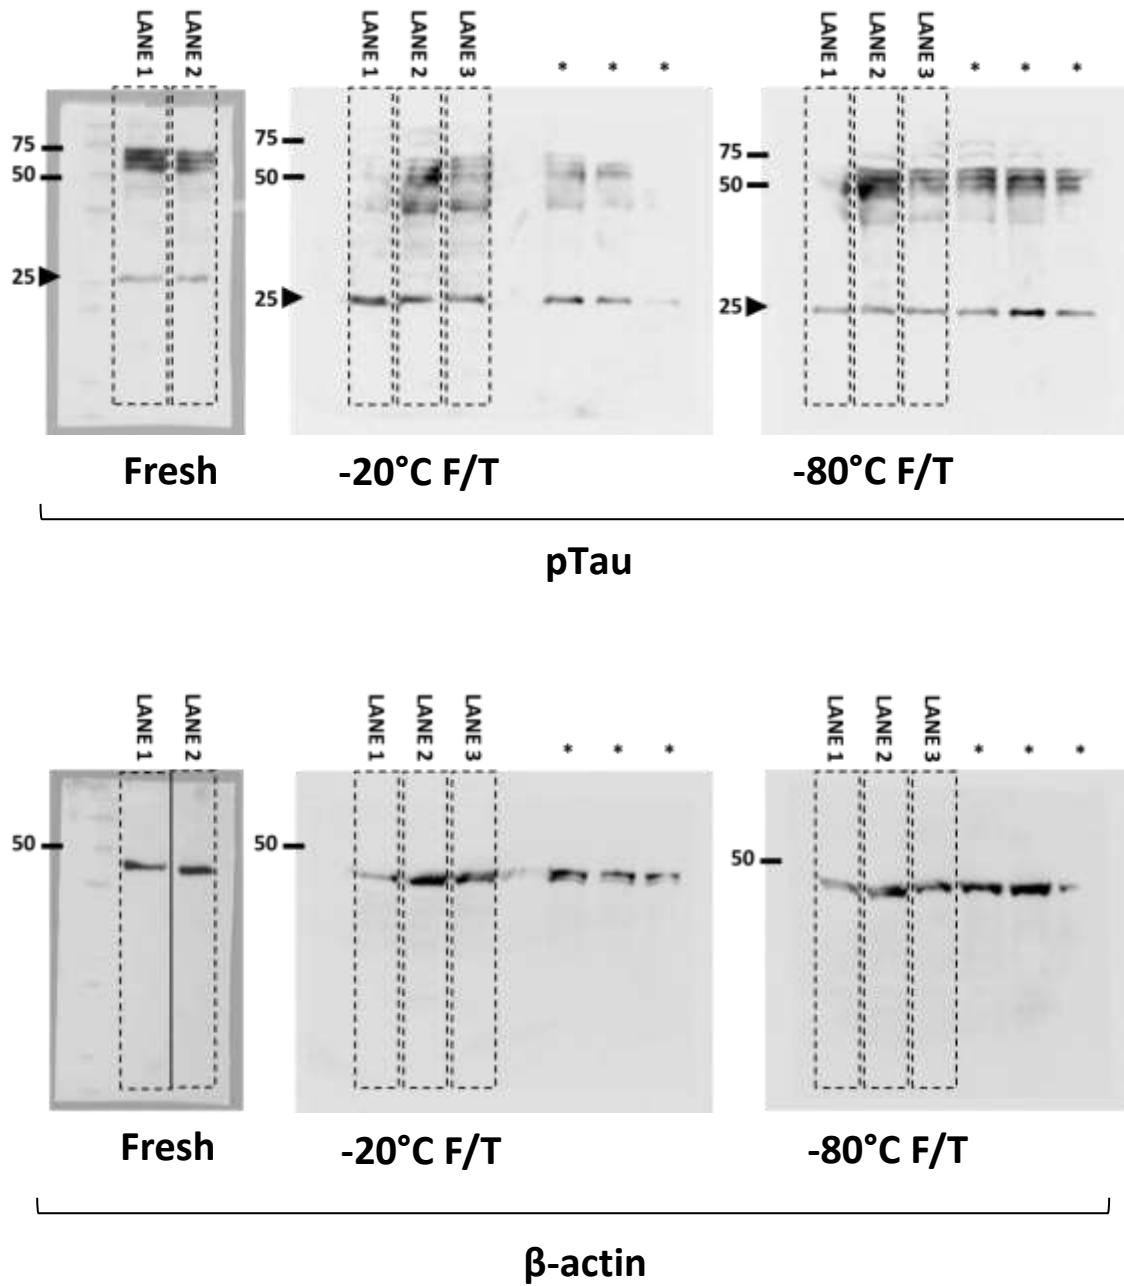

**Figure S6.** Raw data of **Fig.1 – Panel F** western blotting of fresh and freeze/thawed extracts from rat hippocampus and frontal cortex (lanes used in the main figure are indicated by dotted frames).

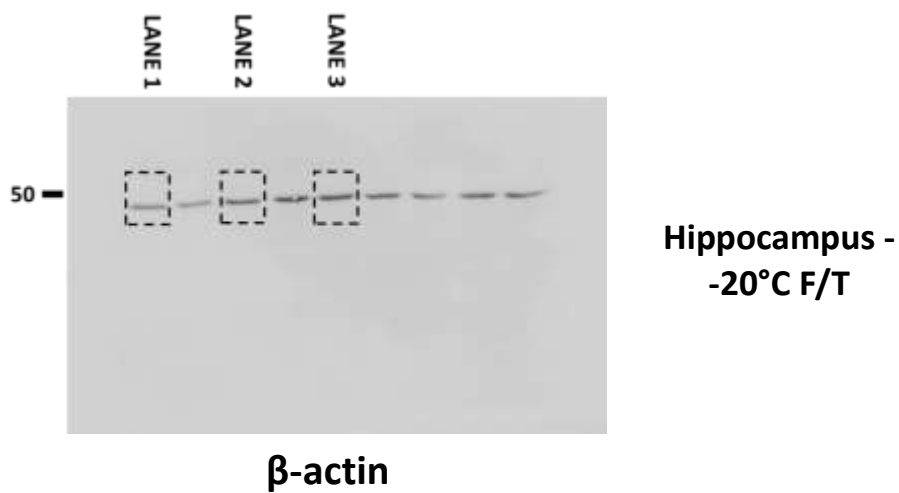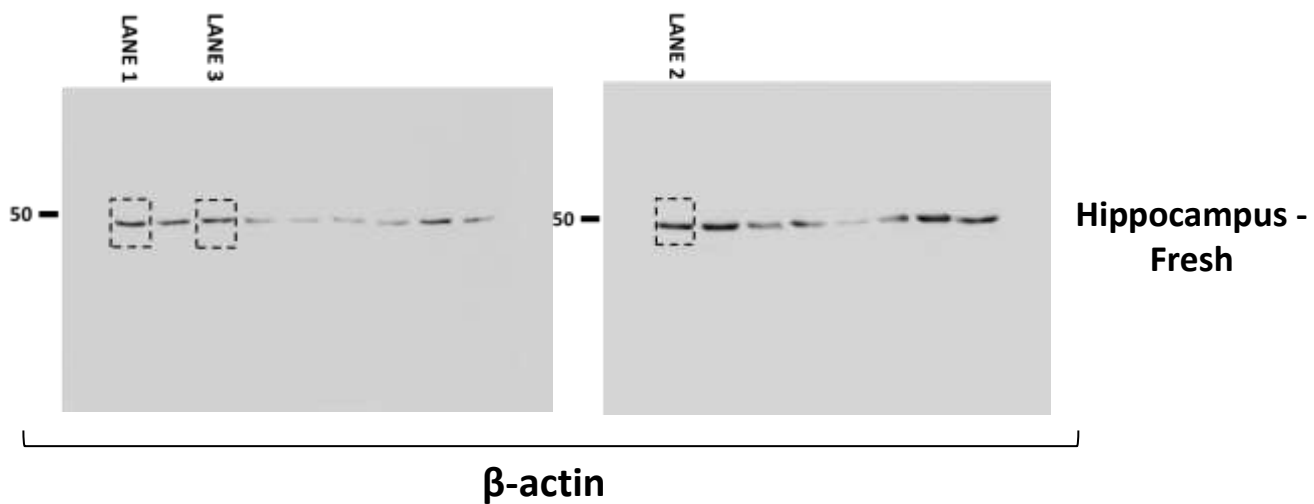

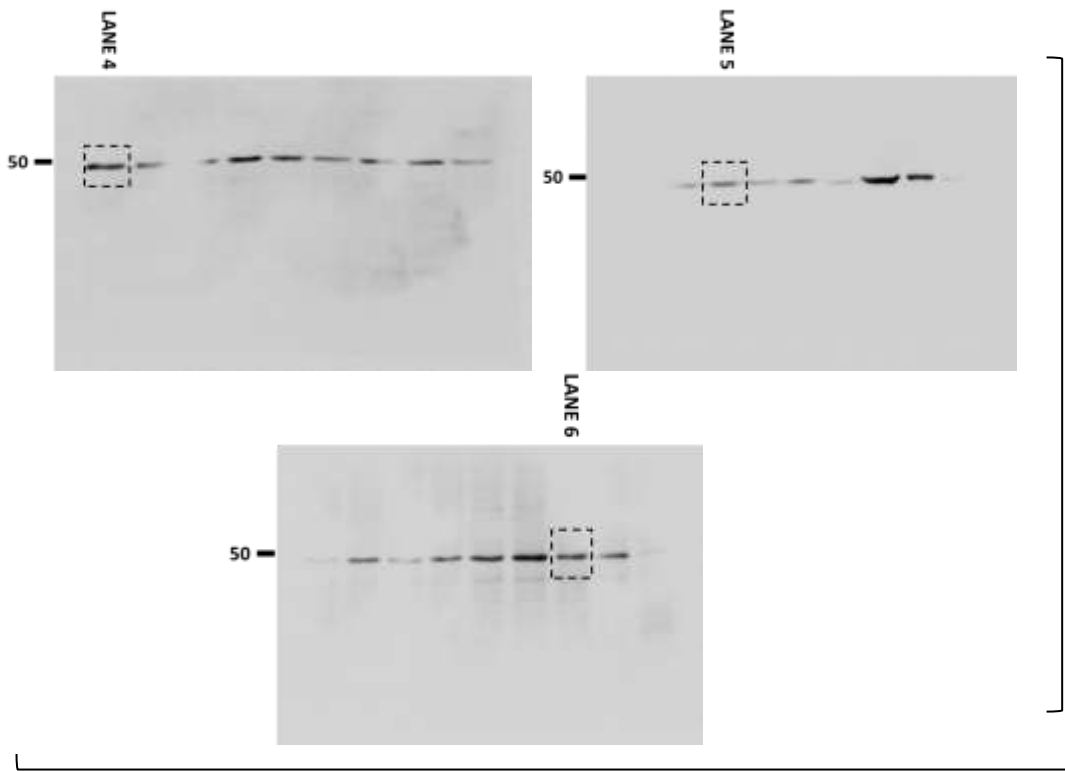

Frontal Cortex -  
-20°C F/T

$\beta$ -actin

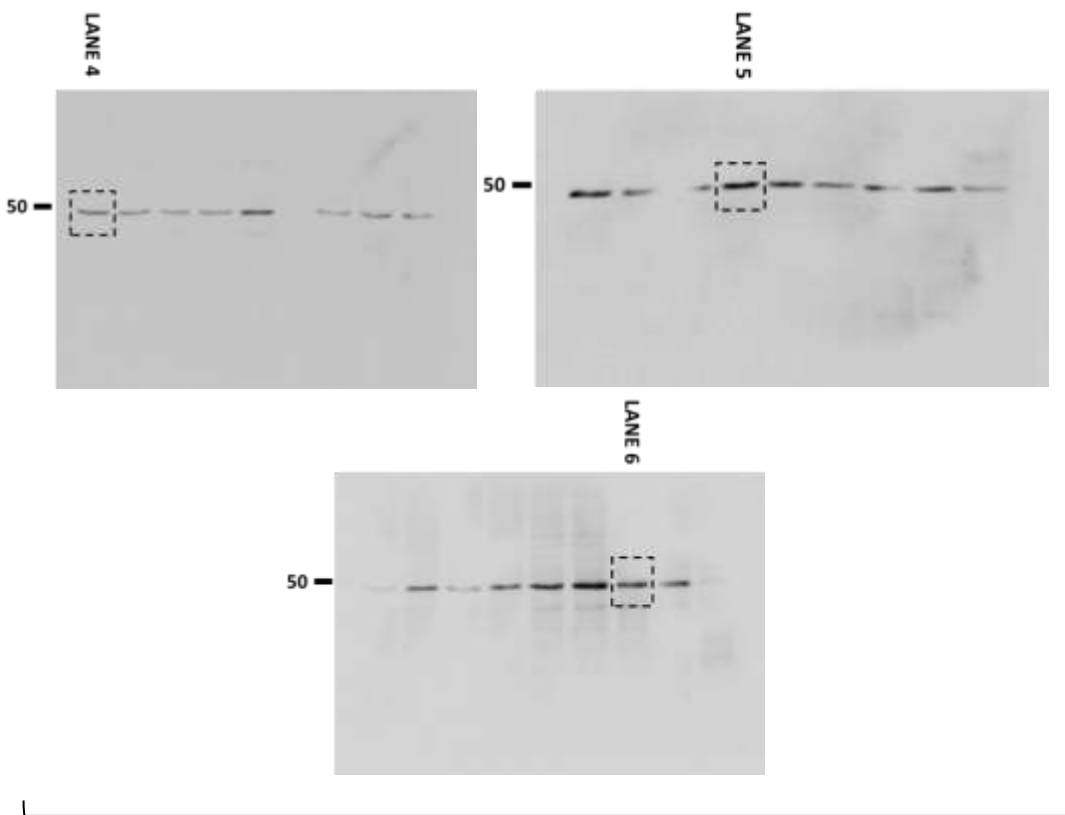

Frontal Cortex -  
Fresh

$\beta$ -actin

**Figure S7.** Raw data of **Fig.3 – Panel A** western blotting of fresh and freeze/thawed extracts from 3xTg mice frontal cortex (lanes used in the main figure are indicated by dotted frames).

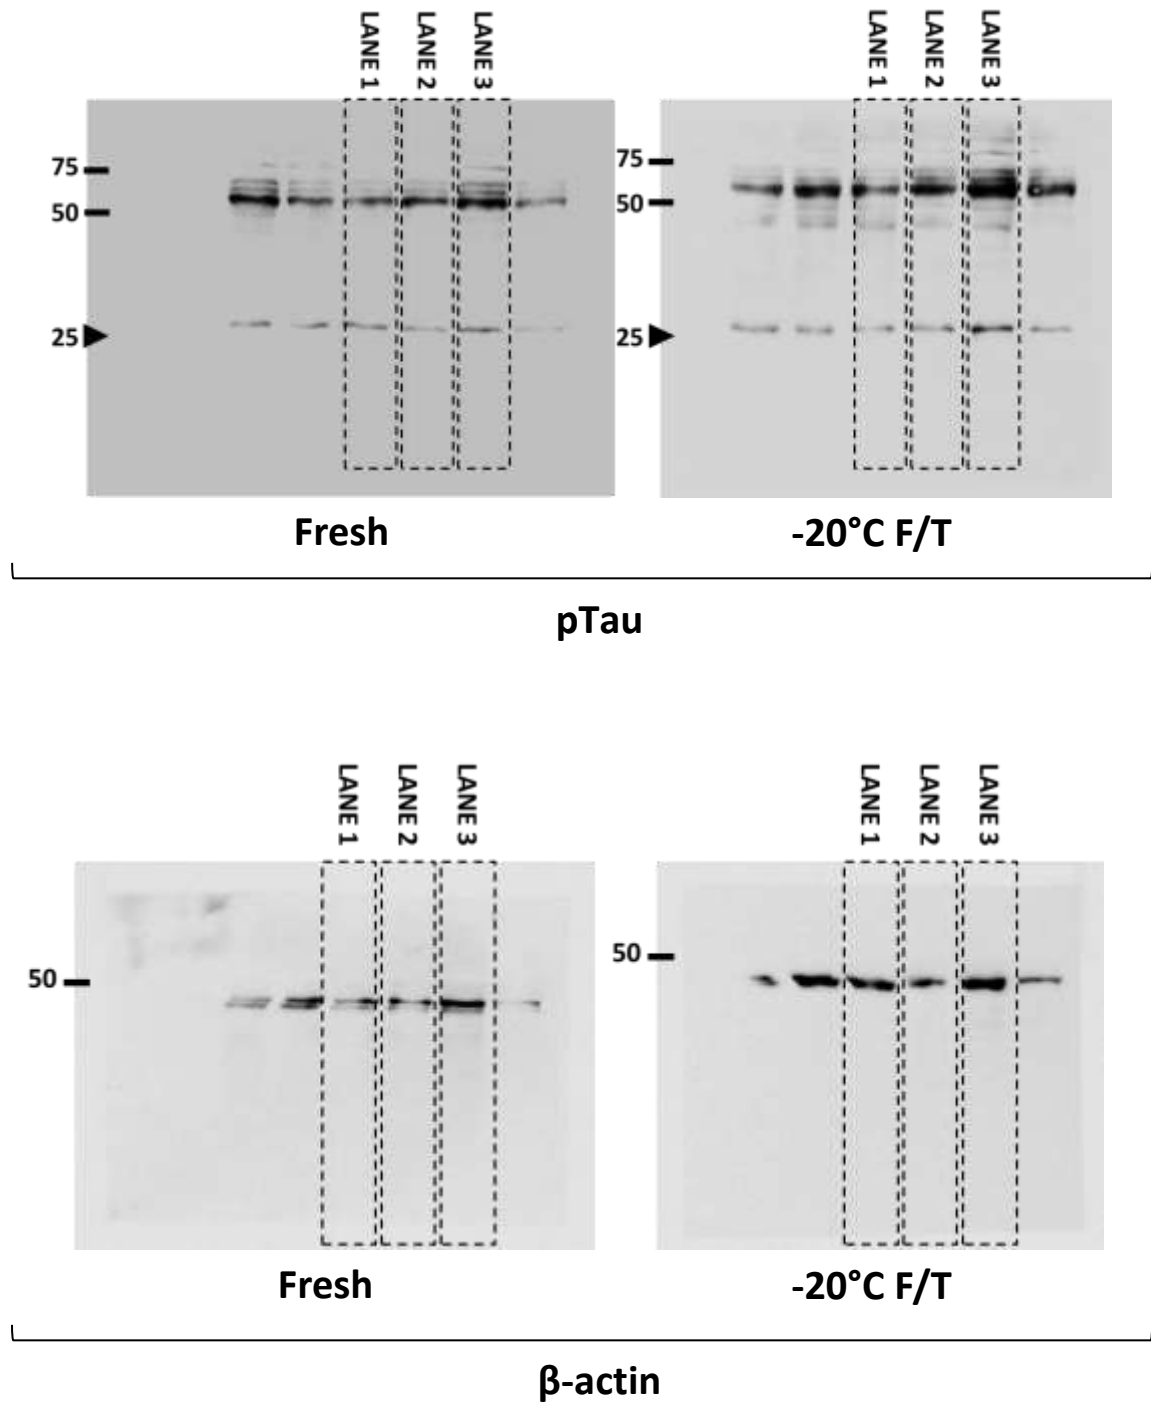



**Figure S8.** Raw data of **Fig.3 – Panel C** western blotting of fresh and freeze/thawed extracts from human frontal cortex (lanes used in the main figure are indicated by dotted frames). Asterisks (\*) stand for lanes with human extracts frozen at -80°C.

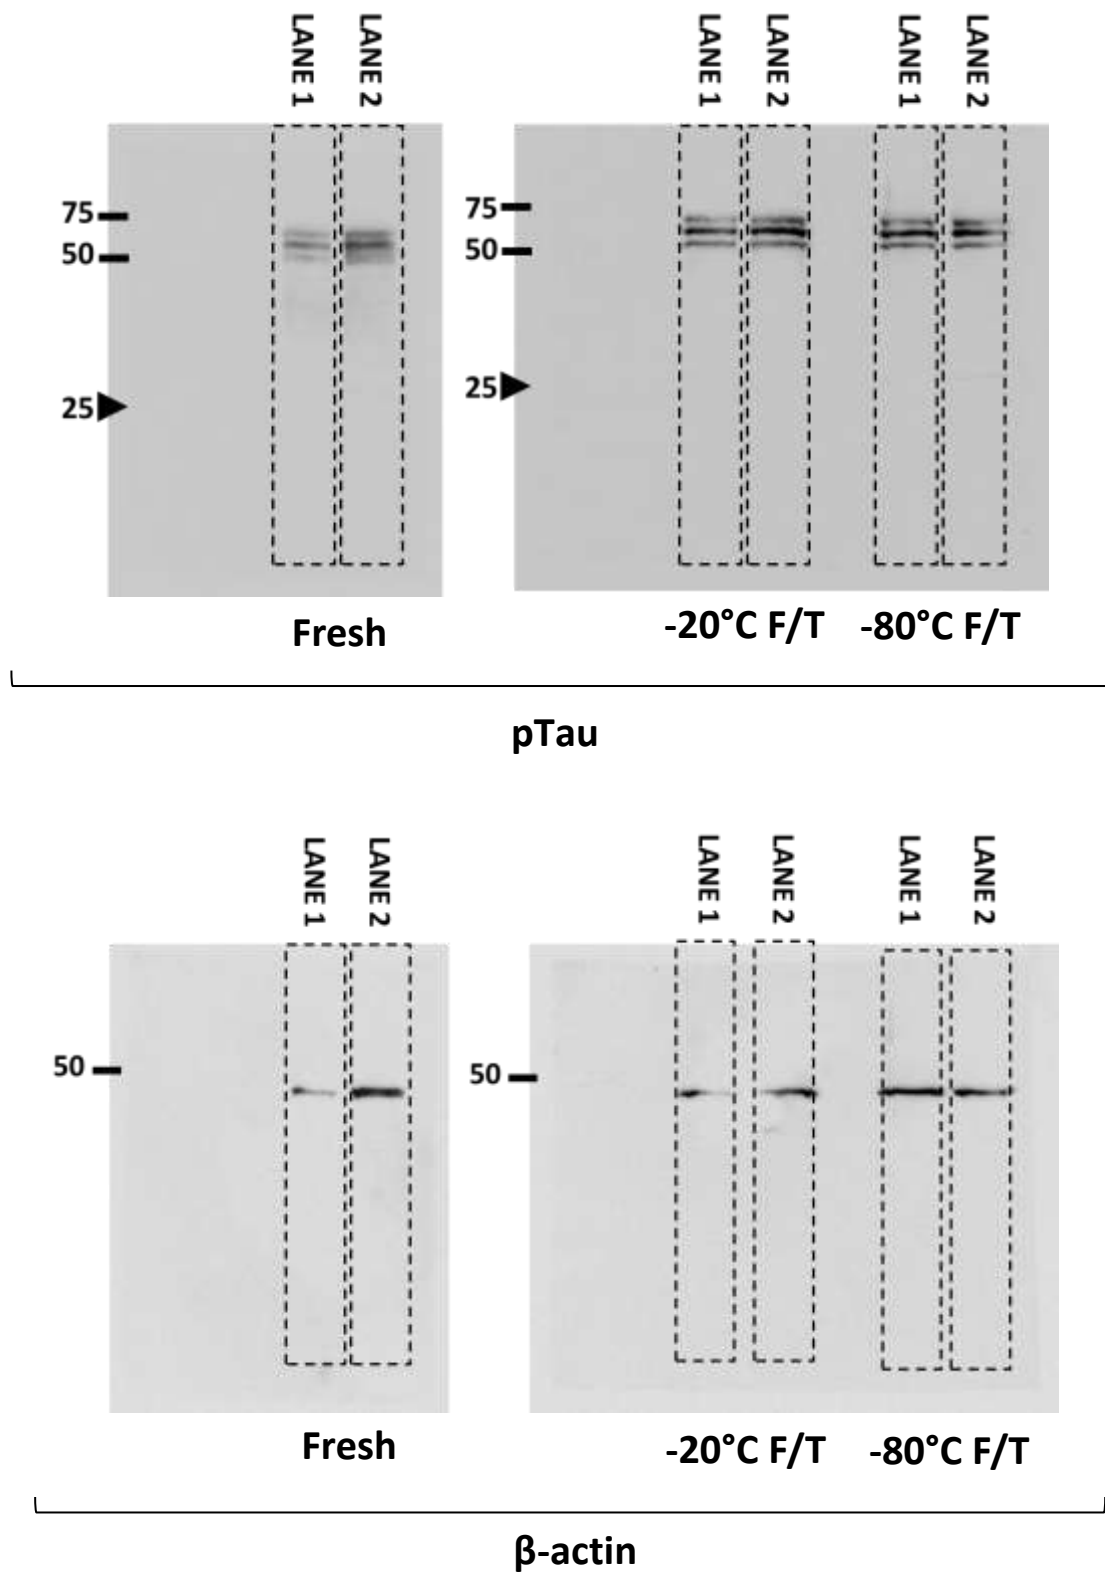

**Figure S9.** Raw data of **Fig.5 – Panel A** western blotting of fresh, freeze/thawed and pre-treated (previously diluted in loading buffer prior to freezing) freeze/thawed extracts from frontal cortex of Wistar (WT) rats, probed in the same membrane for pTau and  $\beta$ -actin.

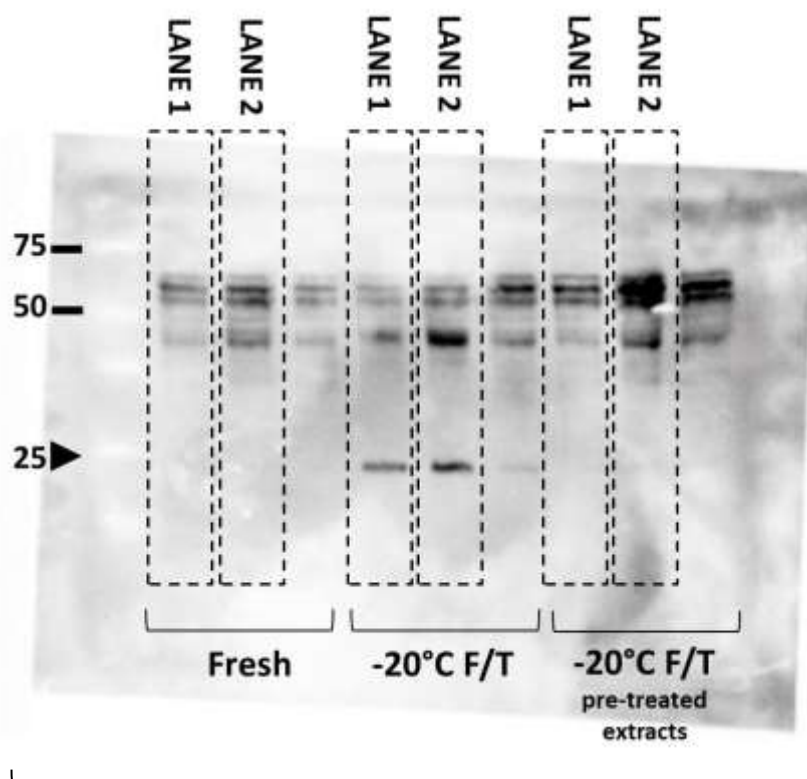

pTau

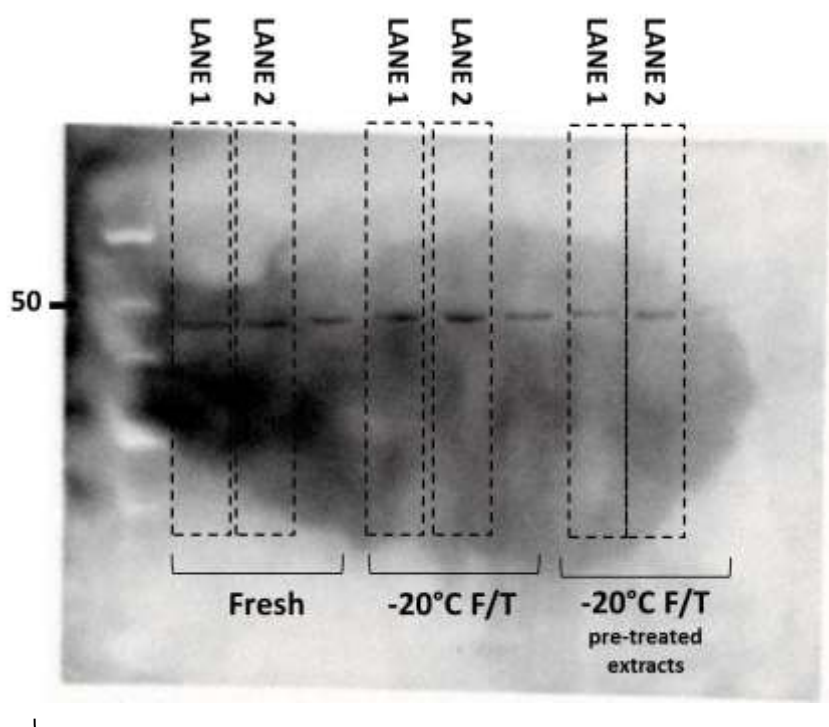

$\beta$ -actin

**Table S1.** Storage time of each freeze/thawed extract used in western blotting analysis displayed at **Fig.1, Fig.3** and **Fig.5**.

| Figure | Panel | Sample | Evaluated epitope    | Storage time (-20°C or -80° C) |
|--------|-------|--------|----------------------|--------------------------------|
| 1      | A     | WAR 1  | pTau                 | 35 days                        |
| 1      | A     | WAR 2  | pTau                 | 35 days                        |
| 1      | A     | WAR 3  | pTau                 | 35 days                        |
| 1      | A     | WT 1   | pTau                 | 35 days                        |
| 1      | A     | WT 2   | pTau                 | 35 days                        |
| 1      | A     | WT 3   | pTau                 | 35 days                        |
| 1      | A     | WT 4   | Total Tau            | 35 days                        |
| 1      | A     | WT 2   | Total Tau            | 35 days                        |
| 1      | A     | WAR 1  | Total Tau            | 35 days                        |
| 1      | A     | WAR 4  | Total Tau            | 35 days                        |
| 1      | A     | WT 3   | Total Tau            | 35 days                        |
| 1      | A     | WAR 5  | Total Tau            | 35 days                        |
| 1      | B     | WT 5   | pTau                 | undetermined ( $\geq 8$ days)  |
| 1      | B     | WAR 6  | pTau                 | 4 months                       |
| 1      | B     | WAR 7  | pTau                 | 15 days                        |
| 1      | B     | WAR 8  | Total Tau            | 4 months                       |
| 1      | B     | WAR 9  | Total Tau            | 4 months                       |
| 1      | B     | WT 6   | Total Tau            | 9 months                       |
| 1      | E     | WT 8   | pTau/ $\beta$ -actin | 15 days                        |
| 1      | E     | WT 9   | pTau/ $\beta$ -actin | 15 days                        |
| 1      | E     | WT 10  | pTau/ $\beta$ -actin | 15 days                        |
| 1      | F     | WT 4   | $\beta$ -actin       | 35 days                        |
| 1      | F     | WT 3   | $\beta$ -actin       | 35 days                        |
| 1      | F     | WAR 2  | $\beta$ -actin       | 35 days                        |
| 1      | F     | WT 5   | $\beta$ -actin       | undetermined ( $\geq 8$ days)  |
| 1      | F     | WT 7   | $\beta$ -actin       | 15 days                        |

|   |   |         |                      |          |
|---|---|---------|----------------------|----------|
| 1 | F | WAR 8   | $\beta$ -actin       | 4 months |
| 3 | A | 3xTg 1  | pTau/ $\beta$ -actin | 15 days  |
| 3 | A | 3xTg 2  | pTau/ $\beta$ -actin | 15 days  |
| 3 | A | 3xTg 3  | pTau/ $\beta$ -actin | 15 days  |
| 3 | C | Human 1 | pTau/ $\beta$ -actin | 15 days  |
| 3 | C | Human 2 | pTau/ $\beta$ -actin | 15 days  |
| 5 | - | WT 11   | pTau/ $\beta$ -actin | 15 days  |
| 5 | - | WT 12   | pTau/ $\beta$ -actin | 15 days  |
